# Supplementary material
Source: ML conference proceedings conference paper supplement (https://openaccess.thecvf.com/content/WACV2023/html/Wu_Marker-Removal_Networks_To_WACV_2023_paper.html)
Supplement: Supplementary file 1 [file Wu_Marker-Removal_Networks_To_WACV_2023_supplemental.zip]

## Right Hand Task

R1: 

R2: 

R3: 

R4: 

R5: 

R6: 

R7: 

R8: 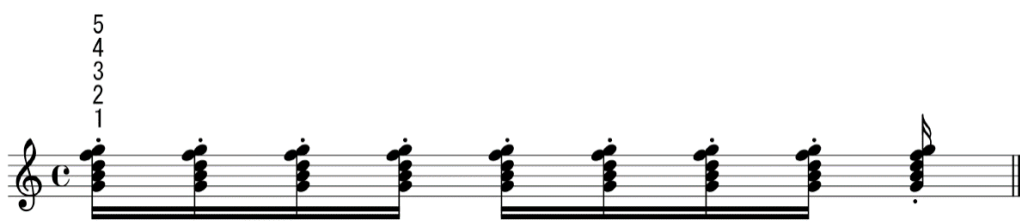

R9: 

R10: 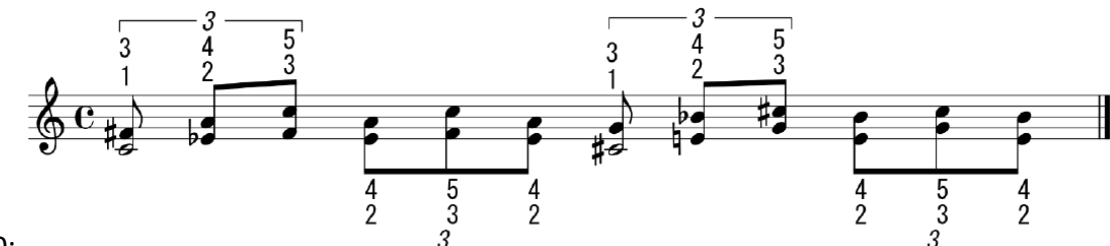

## Left Hand Task

L1: 

L2: 

L3: 

L4: 

L5: 

L6: 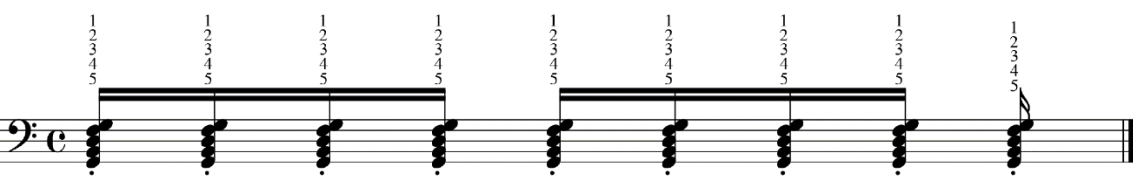

L7: 

## Both Hand Task

B1:

# Sonata in C

K. 545  
for piano solo

W.A. Mozart (1756-1791)

**Allegro** (♩ = 132)

*mp*

5 1 3 4 1 2 3 4 1 2

5

1 4 1 4 1 4 1 4

*p*

4

8

1 4 1 1 1 3 2

*p* *cresc.*

3 1 2

11

*f*

5 4 2 5 3 2

2

B2:

**Étude in C Major**  
Fryderyk Franciszek Chopin      Opus 10 No. 1      Frédéric François Chopin  
(1810 - 1849)

**Allegro** (♩ = 176)  
*legato*

Piano

8va



B3:

**F3 Etude\_op.10-2**

(♩ = 144)  
**Allegro**  
*sempre legato*

cresc. --



B4:

Allegro (♩ = 88)

Piano

*f*

*veloce*

8va

8va

8va

*cresc.*

*fz*

10

13

*cresc.*

8va

B5:

5.

*Sbrillante*

*sempre legato*

*f*

*p*

*cresc.*

*poco rall.*

*pp*

111 Edition Peters

B6;

# F5 Etude\_op.10-4

3

*fp*

5

2

1

3

1

5

B7:

Assai vivace. (♩ = 152)

10.

♩ = 152

*legato*

B8:

## Étude in C Minor

Opus 25 No. 12

Fryderyk Franciszek Chopin

Frédéric François Chopin  
(1810 - 1849)

Molto allegro con fuoco (♩ = 80)

Piano

*f*

♩ = 80

B9:

# RONDO ALLA TURCA

Mov. 3 from Sonata No. 11, K. 331

Wolfgang Amadeus Mozart (1756–1791)

**Allegretto**

6

13

19

B10:

Free sheet music supplied by: [www.music-scores.com](http://www.music-scores.com)

# "Ah, vous dirai-je, Maman"

Theme and Variations

Mozart  
Paris, 1778  
KV 265

**THEME**

Piano

13



B11:

Alexander Scriabin  
Twenty-Four Préludes

1.

**Vivace** ♩ = 63-76

*p* *cresc.*

*p* *cresc.*
